# Supplementary material for: Unraveling the effects of gas species and surface wettability on the morphology of interfacial nanobubbles
Source: Royal Society of Chemistry journal article supplement (doi:10.1039/d2na00009a), 2022-01-01
Supplement: d2na00009a1.pdf [file d2na00009a1.pdf]

## Supplementary Information

# Unraveling the Effects of Gas Species and Surface Wettability on Morphology of Interfacial Nanobubbles

Kadi Hu<sup>a</sup>, Liang Luo<sup>b</sup>, Xiaoming Sun<sup>a,b</sup>, and Hui Li<sup>\*a</sup>

a. Beijing Advanced Innovation Center for Soft Matter Science and Engineering, Beijing University of Chemistry Technology, Beijing 100029, PR China.

b. State Key Laboratory of Chemical Resource Engineering, Beijing University of Chemical Technology Beijing 100029, PR China.

\*E-mail: hli@mail.buct.edu.cn

## Contents

**Supporting Figures.....S1**

**Supporting Tables.....S6**

## Part I Supporting Figures

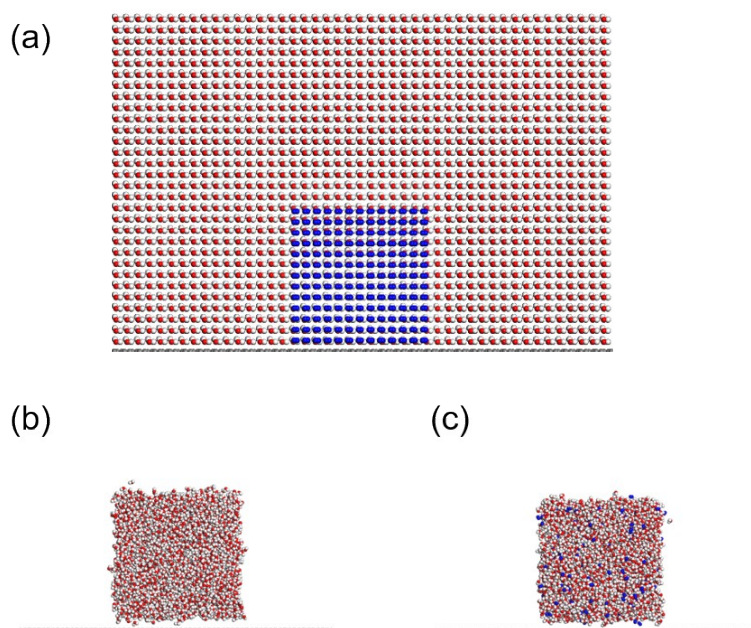

**Fig. S1** (a) Initial structure of the  $\text{H}_2$  nanobubble system, which contains 57375  $\text{H}_2\text{O}$  molecules, 2197  $\text{H}_2$  molecules, and 7524 C atoms. (b) Initial state of the pure water droplet, which contains 5000  $\text{H}_2\text{O}$  molecules. (c) Initial state of the water droplet mixed with  $\text{H}_2$ , which contains 5000  $\text{H}_2\text{O}$  molecules and 150  $\text{H}_2$  molecules.

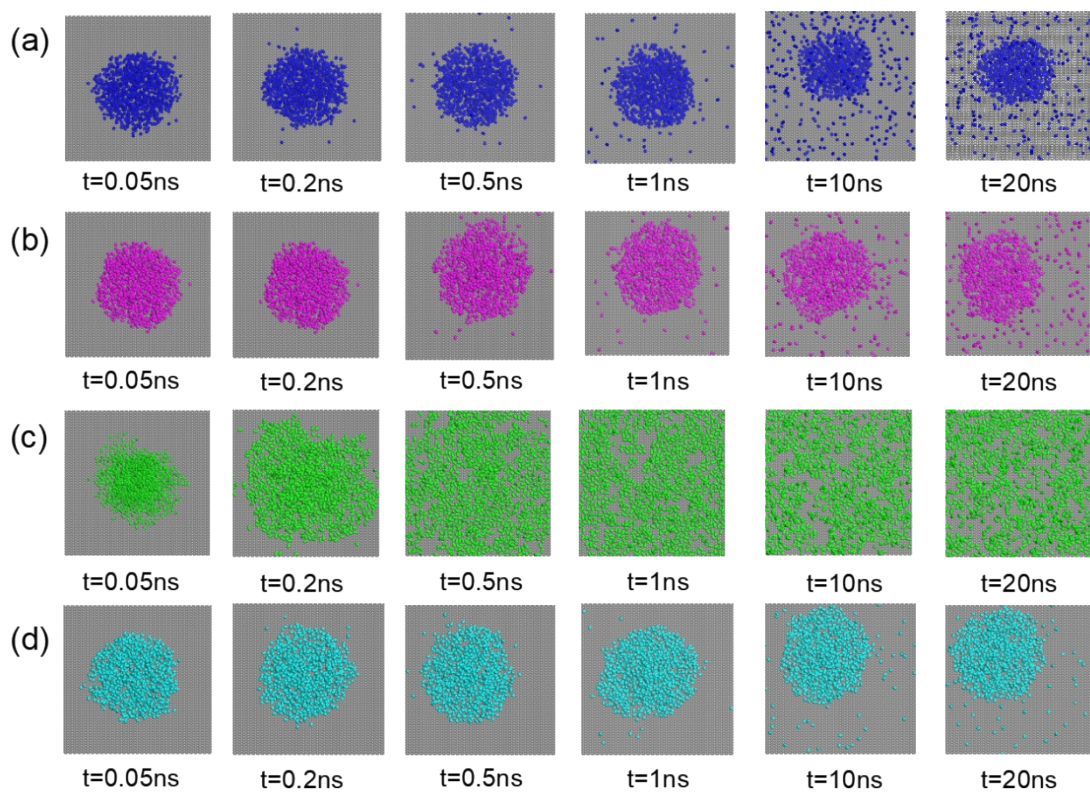

**Fig. S2** Time evolution of the (a)  $\text{H}_2$ , (b)  $\text{O}_2$ , (c)  $\text{CO}_2$ , and (d)  $\text{N}_2$  nanocluster morphologies on atomistic flat surfaces (plan views).

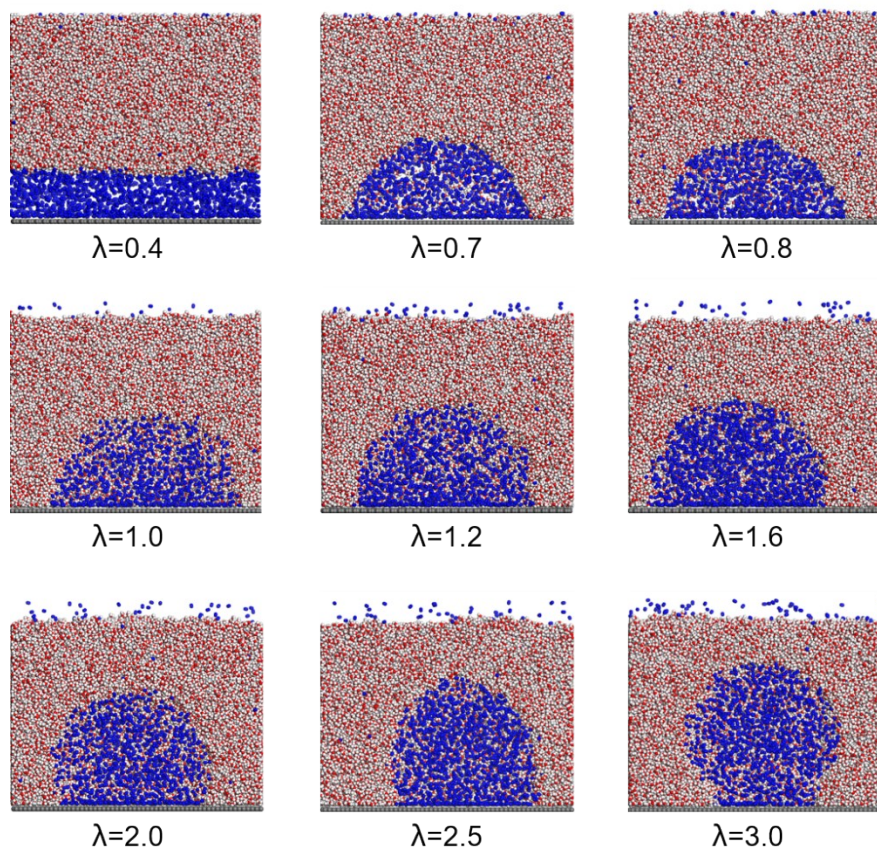

**Fig. S3** Snapshots of the nanobubbles on surfaces (side views) with different values of  $\lambda$ , which from small to large denotes the wettability changing from hydrophobic to hydrophilic.

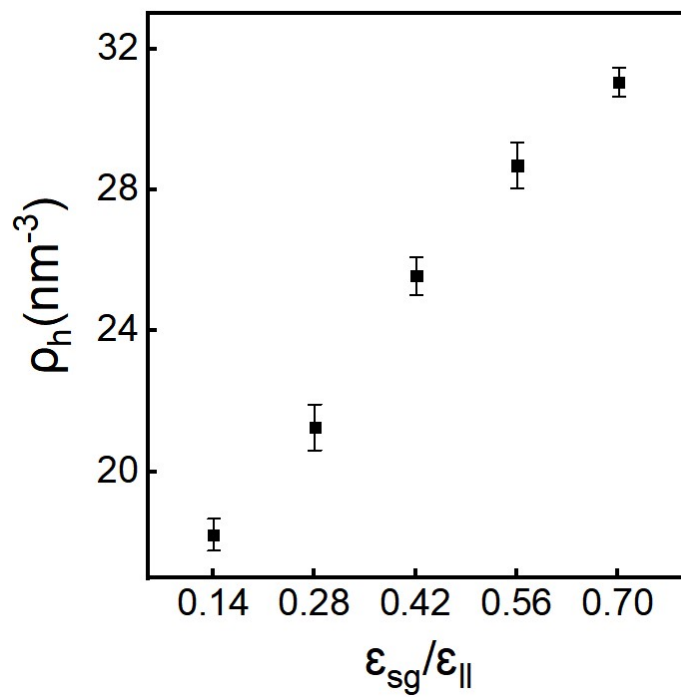

**Fig. S4** Relationship between the density of first H<sub>2</sub> layer and the interaction parameter  $\epsilon_{sg}/\epsilon_{ll}$ . Each  $\epsilon_{sg}/\epsilon_{ll}$  is corresponding to the surfaces of different wettability from  $\lambda=0.5$  to  $\lambda=2.5$ .

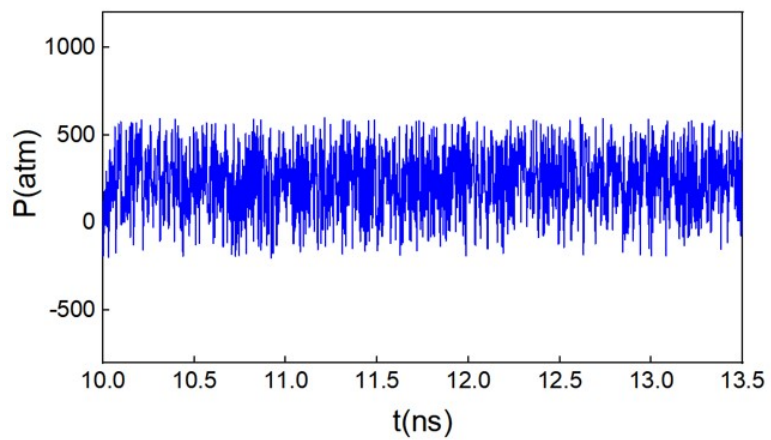

**Fig. S5** Time evolution of the internal pressure of surface nanobubble when  $R_{\text{cur}} = 5.21$  nm ( $\lambda=1.0$ ). The pressure fluctuates a lot as the simulation goes.

## Part II Supporting tables

**Table S1 Interaction parameters between atoms.**<sup>1</sup> C<sub>G</sub>: the atoms of graphene; O<sub>W</sub>: the O atom of H<sub>2</sub>O; H<sub>W</sub>: the H atoms of H<sub>2</sub>O; H<sub>H</sub>: the atoms of H<sub>2</sub>; O<sub>O</sub>: the atoms of O<sub>2</sub>; O<sub>C</sub>: O atom of CO<sub>2</sub>; C<sub>C</sub>: C atom of CO<sub>2</sub>. N: N atom of N<sub>2</sub>.

|                          | C <sub>G</sub> | O <sub>W</sub> | H <sub>W</sub> | H <sub>H</sub> | O <sub>O</sub> | O <sub>C</sub> | C <sub>C</sub> | N     |
|--------------------------|----------------|----------------|----------------|----------------|----------------|----------------|----------------|-------|
| $\mathcal{E}$ (kcal/mol) | 0.086          | 0.155          | 0              | 0.022          | 0.103          | 0.103          | 0.183          | 0.074 |
| $\sigma$ (Å)             | 3.400          | 3.169          | 0              | 2.683          | 3.006          | 3.006          | 2.937          | 3.292 |
| Charge(e)                | 0              | -0.8476        | 0.4238         | 0              | 0              | -0.3256        | 0.6512         | 0     |

The water molecules are treated by the SPC/E model. The Lennard-Jones potential

$E = 4\epsilon\left[\left(\frac{\sigma}{r}\right)^{12} - \left(\frac{\sigma}{r}\right)^6\right]$  with a cutoff of 12.0 Å is employed for the Van der Waals

interaction. The interaction parameters between different types of atoms are

calculated through the Lorentz-Berthelot combining rules ( $\epsilon_{ij} = \sqrt{\epsilon_{ii}\epsilon_{jj}}$ ,

$$\sigma_{ij} = \frac{\sigma_{ii} + \sigma_{jj}}{2}).$$

## References

- 1 J. P. Bouanich, Site-site Lennard-Jones Potential Parameters for N<sub>2</sub>, O<sub>2</sub>, H<sub>2</sub>, CO and CO<sub>2</sub>, *J.*

*Quant. Spectrosc. RA.*, 1992, **47**,243-250.
